# Supplementary material for: Wickerhamomyces anomalus relieves weaning diarrhea via improving gut microbiota and redox homeostasis using a piglet model
Source: Royal Society of Chemistry journal article supplement (doi:10.1039/d2fo01861f), 2022-01-01
Supplement: d2fo01861f1.pdf [file d2fo01861f1.pdf]

## Supplementary materials

**Figure S1.** The amplification results of *W. anomalus* 13611 by PCR.

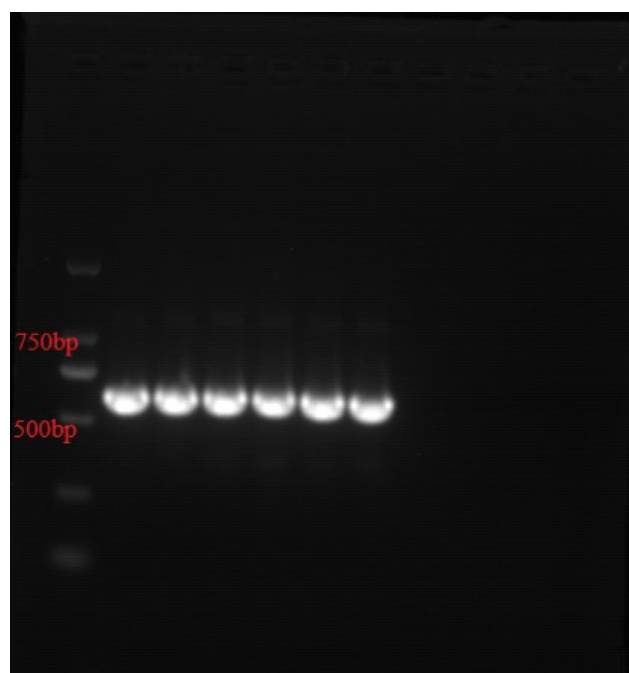

**Table S1.** The biochemical characteristics of *W. amalus* 13611.

| Items      | Results | Items      | Results |
|------------|---------|------------|---------|
| Cellobiose | +       | Inulin     | -       |
| Maltose    | +       | Lactose    | +       |
| Mannitol   | +       | Melezitose | -       |
| Salicin    | +       | Arabinose  | +       |
| Sorbitol   | +       | Inositol   | -       |
| Sucrose    | +       | Galactose  | +       |
| Raffinose  | -       | Xyitol     | -       |

Note: “+” represents positive, which means it can ferment this carbohydrate; “-” represents negative, which means it cannot ferment this carbohydrate.

**Table S2.** Microbial composition of different treatments at the phylum level.

| Taxon | CON | WA |
|-------|-----|----|
|-------|-----|----|

|                        |             |             |
|------------------------|-------------|-------------|
| <i>Firmicutes</i>      | 0.681602263 | 0.680913589 |
| <i>Bacteroidetes</i>   | 0.295815241 | 0.29477719  |
| <i>Proteobacteria</i>  | 0.008385105 | 0.010656682 |
| <i>Actinobacteria</i>  | 0.005389873 | 0.008026808 |
| <i>Tenericutes</i>     | 0.003834886 | 0.002432855 |
| <i>Cyanobacteria</i>   | 0.002461267 | 0.002081042 |
| <i>Spirochaetes</i>    | 0.001813294 | 0.000791441 |
| <i>TM7</i>             | 0.000262542 | 6.37E-05    |
| <i>Euryarchaeota</i>   | 0.000184648 | 8.55E-05    |
| <i>Verrucomicrobia</i> | 7.59E-05    | 7.65E-05    |
| <i>Chlamydiae</i>      | 3.85E-05    | 7.79E-05    |
| <i>WPS_2</i>           | 7.50E-05    | 0           |
| <i>Fibrobacteres</i>   | 6.15E-05    | 0           |
| <i>Fusobacteria</i>    | 0           | 1.68E-05    |

**Table S3.** Microbial composition of different treatments at the family level.

| <b>Taxon</b>                     | <b>CON</b>  | <b>WA</b>   |
|----------------------------------|-------------|-------------|
| <i>Prevotellaceae</i>            | 0.211853208 | 0.217049849 |
| <i>Streptococcaceae</i>          | 0.192475754 | 0.110284313 |
| <i>Lactobacillaceae</i>          | 0.101051677 | 0.19637814  |
| <i>Veillonellaceae</i>           | 0.129728377 | 0.114866823 |
| <i>Ruminococcaceae</i>           | 0.109212469 | 0.120283486 |
| <i>Lachnospiraceae</i>           | 0.066988533 | 0.084717074 |
| <i>S24_7</i>                     | 0.038723694 | 0.040210559 |
| <i>[Paraprevotellaceae]</i>      | 0.027033673 | 0.023324457 |
| <i>Unspecified_Clostridiales</i> | 0.024003612 | 0.0166985   |
| <i>Clostridiaceae</i>            | 0.023817305 | 0.006533932 |
| <i>Unspecified_Bacteroidales</i> | 0.016119854 | 0.009992676 |
| <i>Erysipelotrichaceae</i>       | 0.009661119 | 0.011173684 |
| <i>Christensenellaceae</i>       | 0.009451117 | 0.006942229 |
| <i>Coriobacteriaceae</i>         | 0.005259145 | 0.007925039 |

**Table S4.** Microbial composition of different treatments at the genus level.

| Taxon                                  | CON         | WA          |
|----------------------------------------|-------------|-------------|
| <i>Prevotella</i>                      | 0.211671438 | 0.217049849 |
| <i>Streptococcus</i>                   | 0.192475754 | 0.110260791 |
| <i>Lactobacillus</i>                   | 0.100959962 | 0.196327919 |
| <i>Megasphaera</i>                     | 0.06985205  | 0.059971257 |
| <i>Unspecified_Ruminococcaceae</i>     | 0.046918966 | 0.055698637 |
| <i>Unspecified_S24_7</i>               | 0.038723694 | 0.040210559 |
| <i>Phascolarctobacterium</i>           | 0.025259203 | 0.030801879 |
| <i>Gemmiger</i>                        | 0.02225814  | 0.02896128  |
| <i>[Prevotella]</i>                    | 0.021904637 | 0.01980111  |
| <i>Unspecified_Lachnospiraceae</i>     | 0.021950624 | 0.019727791 |
| <i>Unspecified_Clostridiales</i>       | 0.024003612 | 0.0166985   |
| <i>Blautia</i>                         | 0.012017829 | 0.028191992 |
| <i>Oscillospira</i>                    | 0.019174787 | 0.016995046 |
| <i>Mitsuokella</i>                     | 0.016885587 | 0.013098312 |
| <i>Unspecified_Bacteroidales</i>       | 0.016119854 | 0.009992676 |
| <i>Unspecified_Clostridiaceae</i>      | 0.018438116 | 0.005136359 |
| <i>Roseburia</i>                       | 0.010286999 | 0.010273546 |
| <i>Ruminococcus</i>                    | 0.011335336 | 0.008730094 |
| <i>Faecalibacterium</i>                | 0.008728718 | 0.008323345 |
| <i>Unspecified_Christensenellaceae</i> | 0.009451117 | 0.006942229 |
| <i>Other</i>                           | 0.101583576 | 0.096806828 |

**Table S5.** The analysis results of the bacterial taxa differentially by LEfSe.

|                                                                                                                          | Mean relative abundance within<br>the group<br>(Logarithmic conversion value) | Location | LDA<br>score | P<br>value |
|--------------------------------------------------------------------------------------------------------------------------|-------------------------------------------------------------------------------|----------|--------------|------------|
| <i>k_Bacteria.p_Firmicutes.c_Bacilli.o_Lactobacillales.f_Lactobacillaceae</i>                                            | 5.336                                                                         | WA       | 4.876        | 0.016      |
| <i>k_Bacteria.p_Firmicutes.c_Bacilli.o_Lactobacillales.f_Lactobacillaceae.g_Lactobacillus</i>                            | 5.336                                                                         | WA       | 4.876        | 0.016      |
| <i>k_Bacteria.p_Firmicutes.c_Bacilli.o_Lactobacillales.f_Lactobacillaceae.g_Lactobacillus.s_helveticus</i>               | 5.089                                                                         | WA       | 4.792        | 0.012      |
| <i>k_Bacteria.p_Firmicutes.c_Bacilli.o_Lactobacillales.f_Lactobacillaceae.g_Lactobacillus.s_delbrueckii</i>              | 3.450                                                                         | WA       | 3.787        | 0.027      |
| <i>k_Bacteria.p_Proteobacteria.c_Betaproteobacteria</i>                                                                  | 3.139                                                                         | CON      | 3.978        | 0.043      |
| <i>k_Bacteria.p_Proteobacteria.c_Betaproteobacteria.o_Burkholderiales</i>                                                | 3.139                                                                         | CON      | 4.868        | 0.010      |
| <i>k_Bacteria.p_Proteobacteria.c_Betaproteobacteria.o_Burkholderiales.f_Oxalobacteraceae</i>                             | 3.139                                                                         | CON      | 3.778        | 0.043      |
| <i>k_Bacteria.p_Firmicutes.c_Bacilli.o_Lactobacillales.f_Streptococcaceae</i>                                            | 4.814                                                                         | CON      | 4.370        | 0.021      |
| <i>k_Bacteria.p_Proteobacteria.c_Betaproteobacteria.o_Burkholderiales.f_Oxalobacteraceae.g_Oxalobacter</i>               | 3.139                                                                         | CON      | 4.044        | 0.043      |
| <i>k_Bacteria.p_Firmicutes.c_Bacilli.o_Lactobacillales.f_Streptococcaceae.g_Streptococcus</i>                            | 4.814                                                                         | CON      | 4.370        | 0.021      |
| <i>k_Bacteria.p_Proteobacteria.c_Betaproteobacteria.o_Burkholderiales.f_Oxalobacteraceae.g_Oxalobacter.s_formigenes</i>  | 3.139                                                                         | CON      | 4.106        | 0.043      |
| <i>k_Bacteria.p_Firmicutes.c_Erysipelotrichi.o_Erysipelotrichales.f_Erysipelotrichaceae.g_Eubacterium.s_cylindroides</i> | 2.964                                                                         | CON      | 4.188        | 0.008      |
| <i>k_Bacteria.p_Firmicutes.c_Bacilli.o_Lactobacillales.f_Streptococcaceae.g_Streptococcus.s_alactolyticus</i>            | 4.814                                                                         | CON      | 4.370        | 0.021      |
